# Supplementary material
Source: publisher figshare collection journal article supplement (https://tandf.figshare.com/ndownloader/files/22734716)

**Supplemental Materials**

**Figure S1. Inpatient Infection Distribution**

1. Baseline


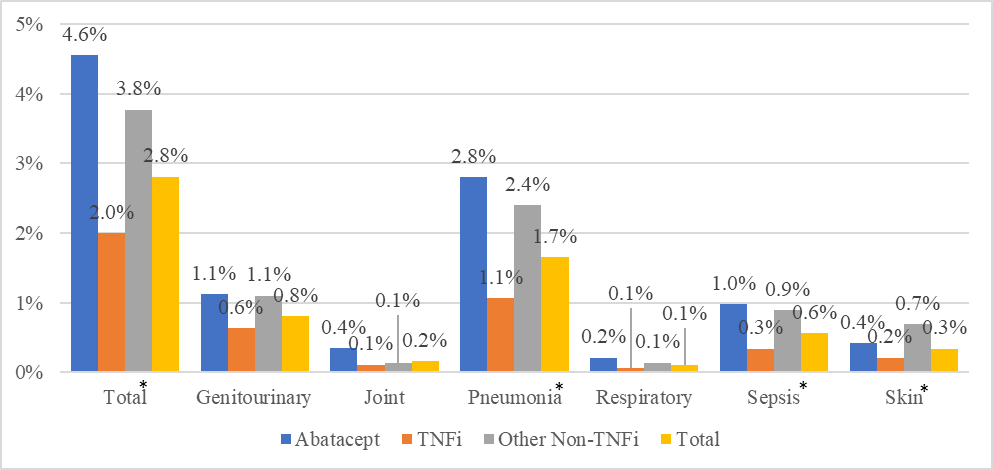


1. Follow-up

*P<0.05

Supplement: Supplementary file 1 [file 22734716]
